# Supplementary material
Source: PubMed Central journal article supplement (PMC3060960)

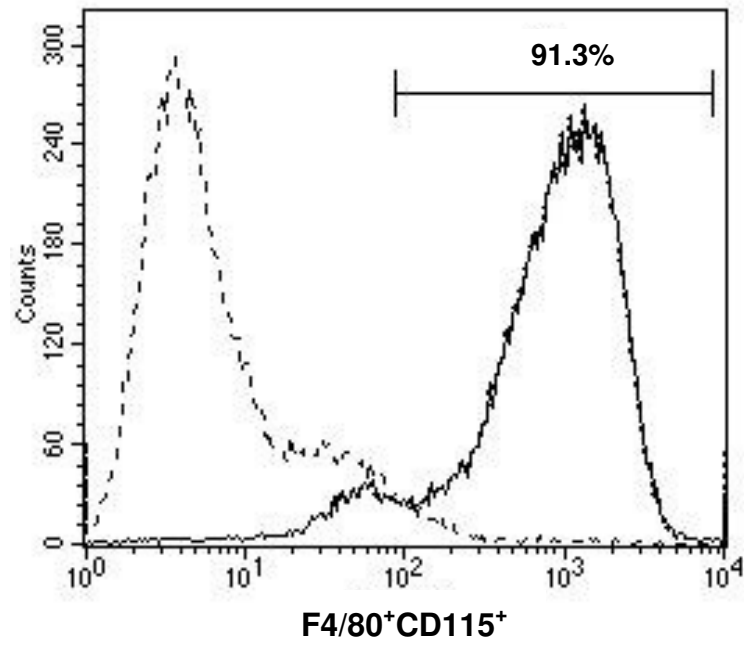

Supplement: NIHMS239297-supplement-01.pdf [file NIHMS239297-supplement-01.pdf]

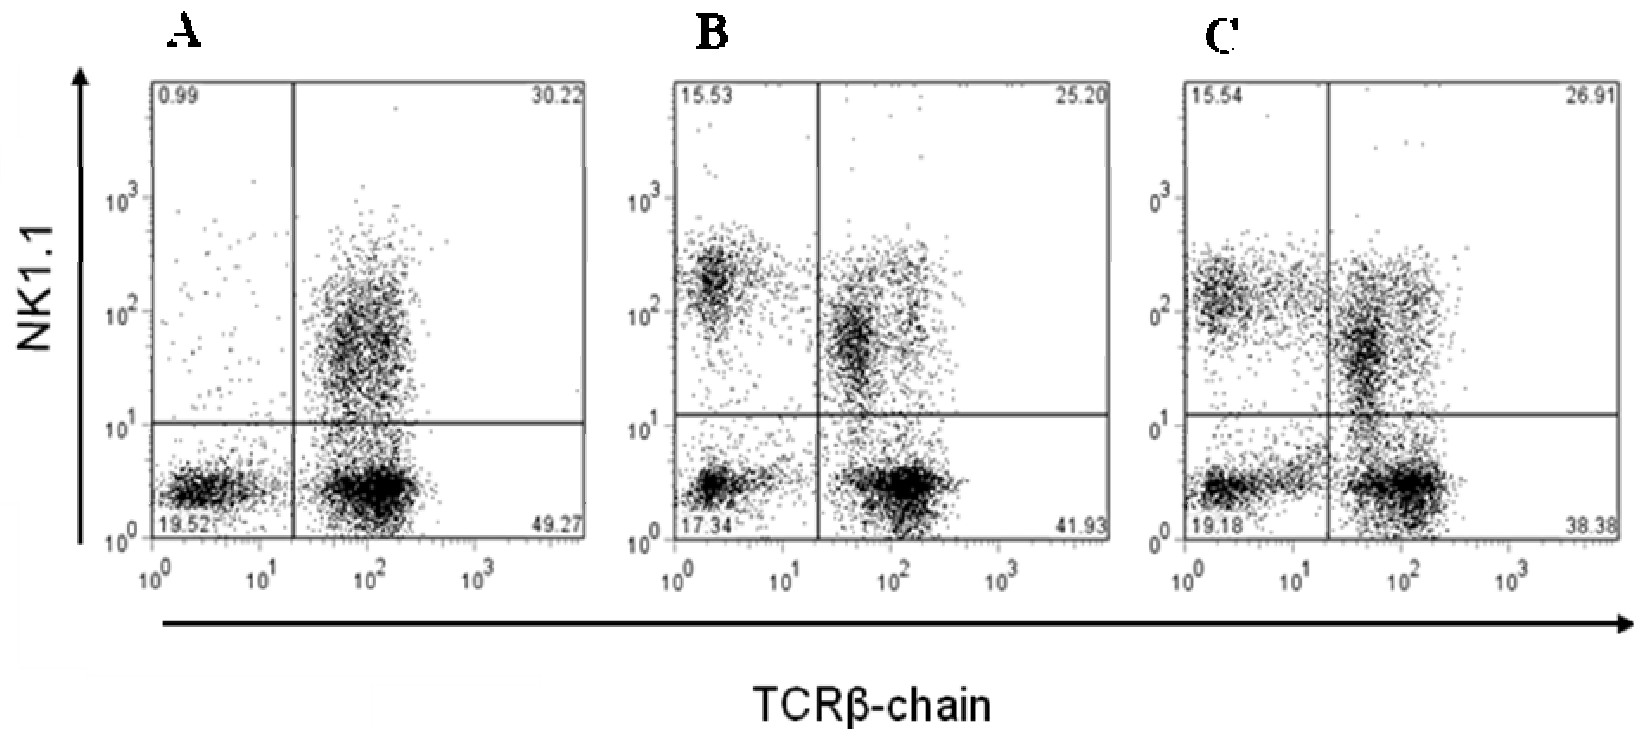

Supplement: NIHMS239297-supplement-02.pdf [file NIHMS239297-supplement-02.pdf]

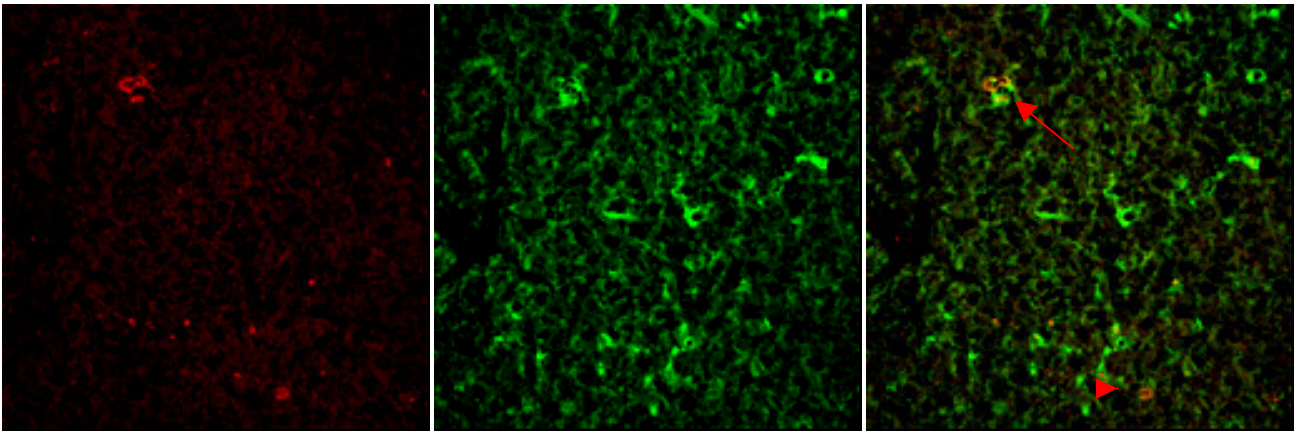

Supplement: NIHMS239297-supplement-03.pdf [file NIHMS239297-supplement-03.pdf]

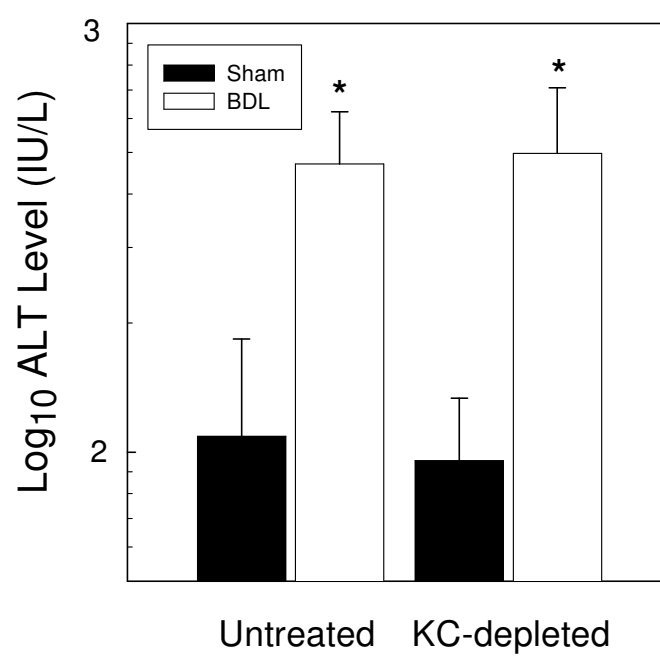

Supplement: NIHMS239297-supplement-04.pdf [file NIHMS239297-supplement-04.pdf]

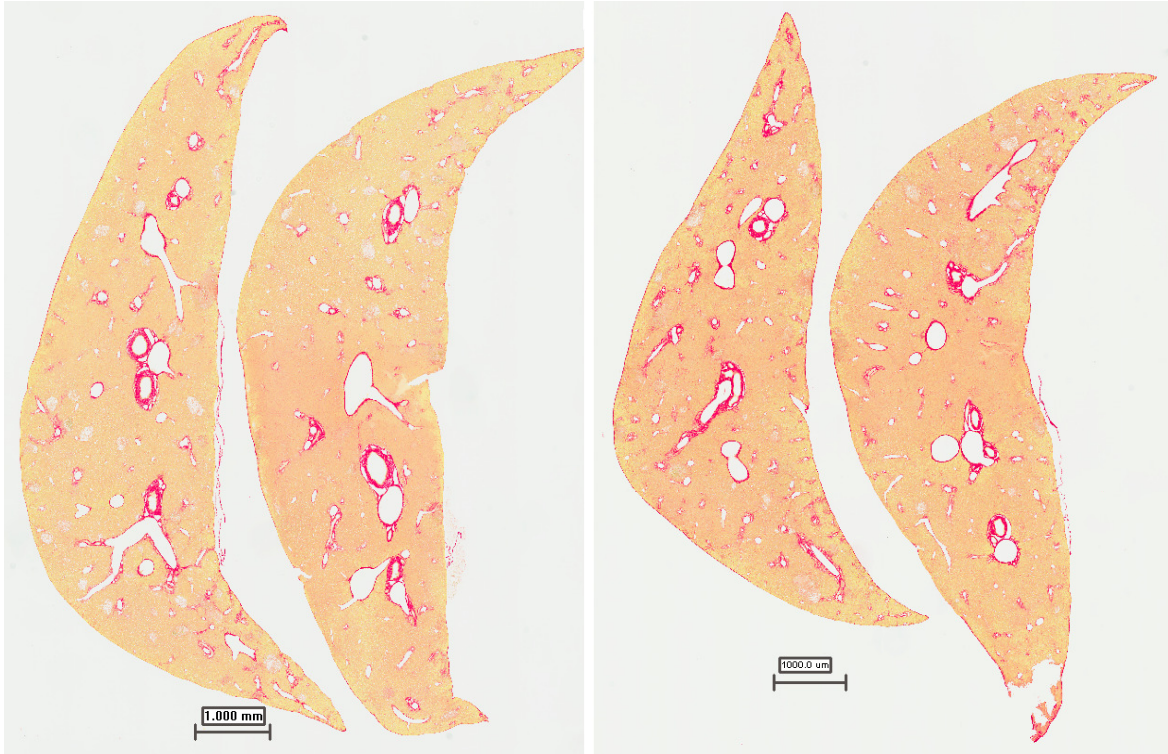

Supplement: NIHMS239297-supplement-05.pdf [file NIHMS239297-supplement-05.pdf]
